# Supplementary material
Source: MDPI journal article supplement (https://www.mdpi.com/2072-4292/14/24/6381)
Supplement: s1 [file s1]

# Supplementary Materials: Evaluation of Hybrid Wavelet Models for Regional Drought Forecasting

Gilbert Hinge, Jay Piplodiya, Ashutosh Sharma, Mohamed A. Hamouda and Mohamed M. Mohamed

Table S1. Geographical and rainfall statistics of IMD stations in the study area.

| Station no. | Latitude (degree) | Longitude (degree) | Monthly Rainfall (mm) |       |                    |          | Coefficient of variation |
|-------------|-------------------|--------------------|-----------------------|-------|--------------------|----------|--------------------------|
|             |                   |                    | Maximum               | Mean  | Standard Deviation | Skewness |                          |
| 1           | 27                | 70                 | 789.66                | 14.21 | 39.05              | 8.35     | 2.75                     |
| 2           | 27.5              | 70                 | 412.06                | 13.51 | 34.88              | 5.10     | 2.58                     |
| 3           | 26                | 70.5               | 533.48                | 19.90 | 46.82              | 4.65     | 2.35                     |
| 4           | 26.5              | 70.5               | 842.92                | 15.78 | 40.61              | 8.32     | 2.57                     |
| 5           | 27                | 70.5               | 715.52                | 14.74 | 37.93              | 7.24     | 2.57                     |
| 6           | 27.5              | 70.5               | 340.72                | 13.71 | 34.25              | 4.63     | 2.50                     |
| 7           | 28                | 70.5               | 344.35                | 13.59 | 34.82              | 4.65     | 2.56                     |
| 8           | 25                | 71                 | 781.29                | 27.59 | 64.25              | 4.13     | 2.33                     |
| 9           | 25.5              | 71                 | 882.07                | 22.88 | 56.49              | 5.61     | 2.47                     |
| 10          | 26                | 71                 | 486.14                | 20.49 | 46.59              | 4.15     | 2.27                     |
| 11          | 26.5              | 71                 | 405.01                | 16.13 | 37.31              | 4.29     | 2.31                     |
| 12          | 27                | 71                 | 370.03                | 15.62 | 35.98              | 4.19     | 2.30                     |
| 13          | 27.5              | 71                 | 331.42                | 14.82 | 34.40              | 4.20     | 2.32                     |
| 14          | 25                | 71.5               | 619.04                | 30.86 | 72.52              | 3.75     | 2.35                     |
| 15          | 25.5              | 71.5               | 678.16                | 24.05 | 55.96              | 4.50     | 2.33                     |
| 16          | 26                | 71.5               | 532.98                | 21.32 | 48.13              | 4.42     | 2.26                     |
| 17          | 26.5              | 71.5               | 349.34                | 17.61 | 37.81              | 3.51     | 2.15                     |
| 18          | 27                | 71.5               | 402.01                | 16.58 | 35.90              | 3.76     | 2.17                     |
| 19          | 27.5              | 71.5               | 367.73                | 16.90 | 35.54              | 3.63     | 2.10                     |
| 20          | 25                | 72                 | 701.64                | 35.66 | 80.27              | 3.55     | 2.25                     |
| 21          | 25.5              | 72                 | 536.68                | 27.07 | 59.32              | 3.60     | 2.19                     |
| 22          | 26                | 72                 | 452.32                | 22.61 | 48.52              | 3.67     | 2.15                     |
| 23          | 26.5              | 72                 | 296.73                | 20.64 | 41.06              | 2.94     | 1.99                     |
| 24          | 27                | 72                 | 415.23                | 18.76 | 38.86              | 3.67     | 2.07                     |
| 25          | 27.5              | 72                 | 359.01                | 18.01 | 39.33              | 3.93     | 2.18                     |
| 26          | 28                | 72                 | 394.44                | 17.91 | 39.55              | 4.07     | 2.21                     |
| 27          | 24.5              | 72.5               | 1099                  | 67.80 | 145.50             | 3.27     | 2.15                     |
| 28          | 25                | 72.5               | 737.38                | 45.41 | 96.19              | 3.27     | 2.12                     |
| 29          | 25.5              | 72.5               | 585.81                | 31.93 | 68.44              | 3.40     | 2.14                     |
| 30          | 26                | 72.5               | 491.99                | 26.19 | 53.62              | 3.26     | 2.05                     |
| 31          | 26.5              | 72.5               | 404.45                | 24.29 | 47.44              | 2.87     | 1.95                     |
| 32          | 27                | 72.5               | 319.13                | 20.87 | 41.30              | 3.10     | 1.98                     |
| 33          | 27.5              | 72.5               | 353.27                | 18.95 | 39.41              | 3.66     | 2.08                     |
| 34          | 28                | 72.5               | 415.05                | 19.88 | 39.87              | 3.67     | 2.01                     |
| 35          | 28.5              | 72.5               | 355.84                | 19.73 | 37.35              | 3.21     | 1.89                     |
| 36          | 24.5              | 73                 | 975.27                | 67.16 | 134.36             | 2.93     | 2.00                     |
| 37          | 25                | 73                 | 803.86                | 49.36 | 99.88              | 3.17     | 2.02                     |
| 38          | 25.5              | 73                 | 714.55                | 38.06 | 79.08              | 3.20     | 2.08                     |
| 39          | 26                | 73                 | 628.21                | 31.80 | 65.36              | 3.17     | 2.06                     |
| 40          | 26.5              | 73                 | 554.51                | 28.96 | 58.48              | 3.15     | 2.02                     |
| 41          | 27                | 73                 | 326.67                | 25.33 | 48.47              | 2.93     | 1.91                     |

|    |      |      |        |       |        |      |      |
|----|------|------|--------|-------|--------|------|------|
| 42 | 27.5 | 73   | 406.4  | 22.58 | 44.08  | 3.39 | 1.95 |
| 43 | 28   | 73   | 439.26 | 22.12 | 42.31  | 3.41 | 1.91 |
| 44 | 28.5 | 73   | 308.09 | 20.80 | 37.41  | 2.84 | 1.80 |
| 45 | 29   | 73   | 253.12 | 17.08 | 32.95  | 3.18 | 1.93 |
| 46 | 24   | 73.5 | 712.7  | 57.74 | 104.84 | 2.27 | 1.82 |
| 47 | 24.5 | 73.5 | 671.2  | 54.77 | 96.87  | 2.26 | 1.77 |
| 48 | 25   | 73.5 | 714.98 | 50.63 | 92.68  | 2.65 | 1.83 |
| 49 | 25.5 | 73.5 | 738.58 | 44.28 | 87.75  | 3.01 | 1.98 |
| 50 | 26   | 73.5 | 691.17 | 36.15 | 73.55  | 3.22 | 2.03 |
| 51 | 26.5 | 73.5 | 505.85 | 32.33 | 63.72  | 3.02 | 1.97 |
| 52 | 27   | 73.5 | 542.58 | 29.00 | 56.99  | 3.41 | 1.97 |
| 53 | 27.5 | 73.5 | 408.01 | 25.68 | 49.90  | 3.33 | 1.94 |
| 54 | 28   | 73.5 | 334.8  | 23.23 | 42.18  | 2.94 | 1.82 |
| 55 | 28.5 | 73.5 | 318.39 | 21.77 | 39.44  | 2.85 | 1.81 |
| 56 | 29   | 73.5 | 249.79 | 18.73 | 33.64  | 2.91 | 1.80 |
| 57 | 29.5 | 73.5 | 311.44 | 18.28 | 34.07  | 3.25 | 1.86 |
| 58 | 23.5 | 74   | 802.45 | 69.76 | 128.19 | 2.36 | 1.84 |
| 59 | 24   | 74   | 718.34 | 60.00 | 109.39 | 2.35 | 1.82 |
| 60 | 24.5 | 74   | 650.49 | 55.72 | 98.74  | 2.28 | 1.77 |
| 61 | 25   | 74   | 648.03 | 50.08 | 88.72  | 2.32 | 1.77 |
| 62 | 25.5 | 74   | 635.01 | 45.80 | 84.53  | 2.64 | 1.85 |
| 63 | 26   | 74   | 515.16 | 39.21 | 74.99  | 2.73 | 1.91 |
| 64 | 26.5 | 74   | 523.88 | 34.58 | 67.10  | 2.85 | 1.94 |
| 65 | 27   | 74   | 577.2  | 32.11 | 61.97  | 3.17 | 1.93 |
| 66 | 27.5 | 74   | 476.02 | 29.60 | 55.85  | 3.19 | 1.89 |
| 67 | 28   | 74   | 475.57 | 26.44 | 48.53  | 3.10 | 1.84 |
| 68 | 28.5 | 74   | 435.59 | 24.66 | 44.81  | 3.04 | 1.82 |
| 69 | 29   | 74   | 248.62 | 21.04 | 37.42  | 2.81 | 1.78 |
| 70 | 29.5 | 74   | 337.73 | 19.76 | 36.06  | 3.10 | 1.82 |
| 71 | 23.5 | 74.5 | 823.8  | 77.74 | 141.29 | 2.32 | 1.82 |
| 72 | 24   | 74.5 | 781.25 | 69.11 | 123.99 | 2.27 | 1.79 |
| 73 | 24.5 | 74.5 | 735.56 | 64.62 | 114.63 | 2.28 | 1.77 |
| 74 | 25   | 74.5 | 745.05 | 57.13 | 103.12 | 2.38 | 1.81 |
| 75 | 25.5 | 74.5 | 575.23 | 49.60 | 91.35  | 2.44 | 1.84 |
| 76 | 26   | 74.5 | 503.69 | 40.58 | 74.54  | 2.45 | 1.84 |
| 77 | 26.5 | 74.5 | 402.23 | 38.53 | 71.45  | 2.53 | 1.85 |
| 78 | 27   | 74.5 | 540.71 | 34.87 | 66.12  | 2.90 | 1.90 |
| 79 | 27.5 | 74.5 | 457.81 | 32.57 | 60.52  | 2.94 | 1.86 |
| 80 | 28   | 74.5 | 512.73 | 31.33 | 56.33  | 2.77 | 1.80 |
| 81 | 28.5 | 74.5 | 520.37 | 28.56 | 51.53  | 2.96 | 1.80 |
| 82 | 29   | 74.5 | 395.23 | 25.58 | 45.41  | 2.85 | 1.78 |
| 83 | 29.5 | 74.5 | 447.64 | 24.21 | 42.39  | 3.05 | 1.75 |
| 84 | 25   | 75   | 675.62 | 62.91 | 112.94 | 2.32 | 1.80 |
| 85 | 25.5 | 75   | 694.99 | 54.52 | 101.44 | 2.47 | 1.86 |
| 86 | 26   | 75   | 563.11 | 45.58 | 84.11  | 2.46 | 1.85 |
| 87 | 26.5 | 75   | 506.04 | 40.68 | 74.37  | 2.53 | 1.83 |
| 88 | 27   | 75   | 556.03 | 39.11 | 73.10  | 2.84 | 1.87 |
| 89 | 27.5 | 75   | 483.1  | 38.01 | 68.01  | 2.75 | 1.79 |
| 90 | 28   | 75   | 539.26 | 34.58 | 59.39  | 2.67 | 1.72 |
| 91 | 28.5 | 75   | 610.08 | 30.82 | 53.62  | 3.06 | 1.74 |
| 92 | 29   | 75   | 533.37 | 28.44 | 49.41  | 3.17 | 1.74 |
| 93 | 24   | 75.5 | 777.21 | 71.13 | 125.50 | 2.37 | 1.76 |
| 94 | 25   | 75.5 | 730.84 | 65.29 | 116.84 | 2.30 | 1.79 |

|     |      |      |        |       |        |      |      |
|-----|------|------|--------|-------|--------|------|------|
| 95  | 25.5 | 75.5 | 683.31 | 59.06 | 108.66 | 2.41 | 1.84 |
| 96  | 26   | 75.5 | 646.29 | 51.43 | 94.03  | 2.39 | 1.83 |
| 97  | 26.5 | 75.5 | 713.03 | 47.20 | 86.41  | 2.65 | 1.83 |
| 98  | 27   | 75.5 | 598.79 | 45.36 | 82.13  | 2.60 | 1.81 |
| 99  | 27.5 | 75.5 | 457.68 | 42.25 | 72.94  | 2.36 | 1.73 |
| 100 | 28   | 75.5 | 498.17 | 39.46 | 65.13  | 2.40 | 1.65 |
| 101 | 28.5 | 75.5 | 490    | 33.57 | 55.34  | 2.65 | 1.65 |
| 102 | 29   | 75.5 | 570.27 | 32.74 | 54.96  | 3.18 | 1.68 |
| 103 | 24.5 | 76   | 847.67 | 76.48 | 136.43 | 2.38 | 1.78 |
| 104 | 25   | 76   | 743.31 | 68.66 | 123.19 | 2.32 | 1.79 |
| 105 | 25.5 | 76   | 653.3  | 60.71 | 111.35 | 2.38 | 1.83 |
| 106 | 26   | 76   | 725.39 | 57.53 | 107.34 | 2.48 | 1.87 |
| 107 | 26.5 | 76   | 898.19 | 52.62 | 96.82  | 2.64 | 1.84 |
| 108 | 27   | 76   | 764.84 | 50.20 | 88.35  | 2.54 | 1.76 |
| 109 | 27.5 | 76   | 490.72 | 48.24 | 80.60  | 2.21 | 1.67 |
| 110 | 24.5 | 76.5 | 948.75 | 80.05 | 142.41 | 2.32 | 1.78 |
| 111 | 25   | 76.5 | 933.22 | 73.11 | 133.05 | 2.40 | 1.82 |
| 112 | 25.5 | 76.5 | 706.25 | 66.44 | 119.21 | 2.31 | 1.79 |
| 113 | 26   | 76.5 | 686.38 | 62.54 | 113.28 | 2.38 | 1.81 |
| 114 | 26.5 | 76.5 | 824.45 | 56.08 | 101.48 | 2.50 | 1.81 |
| 115 | 27   | 76.5 | 586.21 | 51.50 | 88.77  | 2.36 | 1.72 |
| 116 | 27.5 | 76.5 | 494.43 | 51.36 | 84.39  | 2.08 | 1.64 |
| 117 | 28   | 76.5 | 582.4  | 47.56 | 79.43  | 2.33 | 1.67 |
| 118 | 24.5 | 77   | 959.69 | 85.35 | 147.96 | 2.24 | 1.73 |
| 119 | 26.5 | 77   | 672.05 | 56.41 | 100.12 | 2.32 | 1.77 |
| 120 | 27   | 77   | 543.53 | 51.71 | 89.70  | 2.28 | 1.73 |
| 121 | 27.5 | 77   | 490.92 | 50.00 | 84.32  | 2.22 | 1.69 |
| 122 | 26.5 | 77.5 | 584.56 | 58.08 | 101.82 | 2.22 | 1.75 |
| 123 | 27   | 77.5 | 521.53 | 53.17 | 91.17  | 2.18 | 1.71 |

---

**Table S2.** Optimal number of inputs and neurons chosen for the ANN model for 1 month lead time.

| Latitude | Longitude | SPI-3               |              | SPI-6               |              | SPI-12              |              |
|----------|-----------|---------------------|--------------|---------------------|--------------|---------------------|--------------|
|          |           | No. of Neu-<br>rons | No. of input | No. of Neu-<br>rons | No. of input | No. of Neu-<br>rons | No. of input |
| 27       | 70        | 3                   | 4            | 3                   | 7            | 3                   | 13           |
| 27.5     | 70        | 15                  | 4            | 3                   | 10           | 11                  | 14           |
| 26       | 70.5      | 9                   | 6            | 5                   | 6            | 12                  | 15           |
| 26.5     | 70.5      | 9                   | 3            | 11                  | 10           | 4                   | 15           |
| 27       | 70.5      | 3                   | 3            | 3                   | 9            | 11                  | 13           |
| 27.5     | 70.5      | 3                   | 4            | 3                   | 10           | 3                   | 14           |
| 28       | 70.5      | 3                   | 3            | 8                   | 9            | 4                   | 14           |
| 25       | 71        | 3                   | 5            | 4                   | 9            | 5                   | 13           |
| 25.5     | 71        | 12                  | 6            | 6                   | 6            | 6                   | 14           |
| 26       | 71        | 5                   | 4            | 5                   | 6            | 10                  | 15           |
| 26.5     | 71        | 3                   | 4            | 8                   | 9            | 11                  | 13           |
| 27       | 71        | 3                   | 6            | 3                   | 10           | 15                  | 14           |
| 27.5     | 71        | 9                   | 6            | 3                   | 6            | 4                   | 13           |
| 25       | 71.5      | 3                   | 4            | 4                   | 9            | 6                   | 14           |
| 25.5     | 71.5      | 5                   | 5            | 5                   | 10           | 7                   | 13           |
| 26       | 71.5      | 5                   | 3            | 5                   | 10           | 6                   | 14           |
| 26.5     | 71.5      | 3                   | 4            | 5                   | 8            | 6                   | 15           |
| 27       | 71.5      | 13                  | 3            | 11                  | 6            | 3                   | 15           |
| 27.5     | 71.5      | 6                   | 4            | 3                   | 7            | 8                   | 15           |
| 25       | 72        | 8                   | 5            | 7                   | 8            | 10                  | 14           |
| 25.5     | 72        | 5                   | 4            | 3                   | 6            | 8                   | 15           |
| 26       | 72        | 3                   | 5            | 4                   | 8            | 10                  | 15           |
| 26.5     | 72        | 6                   | 5            | 3                   | 10           | 4                   | 14           |
| 27       | 72        | 3                   | 5            | 3                   | 10           | 11                  | 13           |
| 27.5     | 72        | 3                   | 5            | 4                   | 10           | 4                   | 14           |
| 28       | 72        | 5                   | 5            | 5                   | 7            | 3                   | 14           |
| 24.5     | 72.5      | 5                   | 6            | 3                   | 8            | 8                   | 15           |
| 25       | 72.5      | 3                   | 4            | 3                   | 6            | 10                  | 13           |
| 25.5     | 72.5      | 5                   | 4            | 4                   | 6            | 4                   | 15           |
| 26       | 72.5      | 3                   | 4            | 11                  | 7            | 3                   | 14           |
| 26.5     | 72.5      | 4                   | 3            | 3                   | 9            | 8                   | 14           |
| 27       | 72.5      | 3                   | 6            | 11                  | 8            | 5                   | 15           |
| 27.5     | 72.5      | 11                  | 6            | 3                   | 9            | 6                   | 14           |
| 28       | 72.5      | 3                   | 6            | 3                   | 7            | 5                   | 13           |
| 28.5     | 72.5      | 3                   | 5            | 4                   | 7            | 5                   | 13           |
| 24.5     | 73        | 3                   | 6            | 9                   | 10           | 6                   | 15           |
| 25       | 73        | 3                   | 4            | 5                   | 7            | 8                   | 15           |
| 25.5     | 73        | 5                   | 4            | 13                  | 6            | 10                  | 14           |
| 26       | 73        | 3                   | 4            | 3                   | 10           | 6                   | 14           |
| 26.5     | 73        | 3                   | 5            | 5                   | 10           | 12                  | 14           |
| 27       | 73        | 4                   | 6            | 6                   | 9            | 10                  | 15           |
| 27.5     | 73        | 3                   | 6            | 3                   | 9            | 3                   | 15           |
| 28       | 73        | 4                   | 4            | 11                  | 9            | 6                   | 14           |
| 28.5     | 73        | 5                   | 6            | 3                   | 7            | 3                   | 14           |
| 29       | 73        | 9                   | 4            | 3                   | 10           | 4                   | 13           |
| 24       | 73.5      | 4                   | 5            | 5                   | 8            | 6                   | 15           |
| 24.5     | 73.5      | 3                   | 4            | 6                   | 10           | 3                   | 14           |
| 25       | 73.5      | 3                   | 3            | 3                   | 10           | 8                   | 15           |

|      |      |    |   |    |    |    |    |
|------|------|----|---|----|----|----|----|
| 25.5 | 73.5 | 3  | 4 | 3  | 10 | 3  | 15 |
| 26   | 73.5 | 3  | 5 | 3  | 10 | 5  | 13 |
| 26.5 | 73.5 | 3  | 4 | 3  | 8  | 3  | 13 |
| 27   | 73.5 | 15 | 6 | 3  | 9  | 3  | 14 |
| 27.5 | 73.5 | 6  | 5 | 4  | 9  | 3  | 13 |
| 28   | 73.5 | 8  | 6 | 4  | 9  | 5  | 15 |
| 28.5 | 73.5 | 4  | 5 | 3  | 10 | 5  | 15 |
| 29   | 73.5 | 13 | 4 | 5  | 7  | 3  | 13 |
| 29.5 | 73.5 | 5  | 4 | 4  | 9  | 8  | 15 |
| 23.5 | 74   | 3  | 5 | 7  | 7  | 8  | 15 |
| 24   | 74   | 3  | 5 | 10 | 9  | 3  | 15 |
| 24.5 | 74   | 4  | 5 | 10 | 10 | 10 | 14 |
| 25   | 74   | 4  | 6 | 13 | 8  | 15 | 14 |
| 25.5 | 74   | 4  | 6 | 6  | 7  | 3  | 15 |
| 26   | 74   | 3  | 4 | 5  | 8  | 3  | 13 |
| 26.5 | 74   | 4  | 4 | 8  | 8  | 12 | 14 |
| 27   | 74   | 3  | 6 | 12 | 8  | 3  | 13 |
| 27.5 | 74   | 3  | 3 | 5  | 6  | 5  | 13 |
| 28   | 74   | 5  | 4 | 5  | 7  | 3  | 14 |
| 28.5 | 74   | 12 | 6 | 3  | 8  | 4  | 13 |
| 29   | 74   | 8  | 4 | 3  | 10 | 3  | 15 |
| 29.5 | 74   | 8  | 5 | 5  | 9  | 6  | 15 |
| 23.5 | 74.5 | 3  | 5 | 3  | 9  | 6  | 15 |
| 24   | 74.5 | 3  | 6 | 9  | 10 | 8  | 14 |
| 24.5 | 74.5 | 3  | 6 | 3  | 8  | 3  | 14 |
| 25   | 74.5 | 4  | 4 | 11 | 10 | 4  | 15 |
| 25.5 | 74.5 | 3  | 6 | 3  | 9  | 3  | 13 |
| 26   | 74.5 | 3  | 4 | 3  | 9  | 4  | 15 |
| 26.5 | 74.5 | 4  | 5 | 5  | 8  | 11 | 13 |
| 27   | 74.5 | 5  | 5 | 3  | 9  | 4  | 15 |
| 27.5 | 74.5 | 9  | 6 | 11 | 7  | 3  | 13 |
| 28   | 74.5 | 3  | 5 | 5  | 10 | 3  | 13 |
| 28.5 | 74.5 | 3  | 5 | 3  | 10 | 9  | 13 |
| 29   | 74.5 | 4  | 6 | 3  | 10 | 3  | 15 |
| 29.5 | 74.5 | 5  | 6 | 3  | 8  | 3  | 13 |
| 25   | 75   | 5  | 4 | 3  | 10 | 5  | 14 |
| 25.5 | 75   | 5  | 5 | 4  | 7  | 3  | 14 |
| 26   | 75   | 14 | 5 | 3  | 8  | 5  | 13 |
| 26.5 | 75   | 3  | 5 | 5  | 9  | 14 | 14 |
| 27   | 75   | 3  | 6 | 3  | 8  | 3  | 13 |
| 27.5 | 75   | 3  | 3 | 3  | 7  | 5  | 15 |
| 28   | 75   | 5  | 5 | 3  | 7  | 3  | 14 |
| 28.5 | 75   | 4  | 6 | 3  | 10 | 4  | 13 |
| 29   | 75   | 7  | 6 | 3  | 10 | 11 | 15 |
| 24   | 75.5 | 3  | 6 | 3  | 9  | 9  | 15 |
| 25   | 75.5 | 4  | 5 | 3  | 10 | 7  | 15 |
| 25.5 | 75.5 | 4  | 5 | 3  | 9  | 9  | 13 |
| 26   | 75.5 | 3  | 6 | 5  | 9  | 3  | 14 |
| 26.5 | 75.5 | 6  | 5 | 3  | 10 | 4  | 13 |
| 27   | 75.5 | 3  | 4 | 3  | 10 | 10 | 15 |
| 27.5 | 75.5 | 3  | 6 | 6  | 7  | 5  | 13 |
| 28   | 75.5 | 8  | 6 | 6  | 7  | 3  | 13 |
| 28.5 | 75.5 | 4  | 5 | 5  | 6  | 3  | 13 |

|      |      |    |   |    |    |    |    |
|------|------|----|---|----|----|----|----|
| 29   | 75.5 | 3  | 6 | 3  | 6  | 5  | 14 |
| 24.5 | 76   | 3  | 3 | 4  | 10 | 6  | 15 |
| 25   | 76   | 3  | 6 | 4  | 9  | 4  | 13 |
| 25.5 | 76   | 4  | 4 | 4  | 7  | 6  | 13 |
| 26   | 76   | 3  | 4 | 5  | 8  | 4  | 13 |
| 26.5 | 76   | 3  | 5 | 11 | 10 | 7  | 13 |
| 27   | 76   | 3  | 4 | 6  | 10 | 3  | 14 |
| 27.5 | 76   | 10 | 4 | 10 | 8  | 3  | 15 |
| 24.5 | 76.5 | 3  | 5 | 3  | 8  | 3  | 14 |
| 25   | 76.5 | 3  | 4 | 5  | 7  | 3  | 14 |
| 25.5 | 76.5 | 4  | 6 | 8  | 10 | 6  | 13 |
| 26   | 76.5 | 4  | 6 | 4  | 7  | 3  | 14 |
| 26.5 | 76.5 | 4  | 5 | 9  | 6  | 7  | 13 |
| 27   | 76.5 | 11 | 4 | 3  | 10 | 3  | 13 |
| 27.5 | 76.5 | 6  | 5 | 3  | 7  | 3  | 13 |
| 28   | 76.5 | 4  | 3 | 3  | 8  | 3  | 14 |
| 24.5 | 77   | 3  | 6 | 9  | 10 | 11 | 15 |
| 26.5 | 77   | 4  | 6 | 6  | 7  | 3  | 14 |
| 27   | 77   | 7  | 4 | 3  | 9  | 5  | 14 |
| 27.5 | 77   | 6  | 4 | 4  | 10 | 13 | 14 |
| 26.5 | 77.5 | 4  | 4 | 8  | 8  | 5  | 15 |
| 27   | 77.5 | 3  | 6 | 3  | 10 | 6  | 15 |

---
